# Supplementary material
Source: PubMed Central journal article supplement (PMC3401010)
Supplement: supp_110.035808_DMD35808Supplemental.pdf [file supp_110.035808_DMD35808Supplemental.pdf]

## **DRUG METABOLISM AND DISPOSITION**

### **Identification and Validation of Novel hPXR Activators Amongst Prescribed Drugs via Ligand-Based Virtual Screening**

Yongmei Pan, Linhao Li, Gregory Kim, Sean Ekins, Hongbing Wang and Peter W. Swaan

#### **SUPPLEMENTAL DATA**

This Supplemental Information includes 1) a discussion of the effects on Bayesian model predictive performance by using different descriptors. 2) Docking results of test set and SCUT database compounds to hPXR LBD. 3) Two tables with Bayesian, FlexX, and Surfex scores of test set (n = 145) and SCUT database (n = 550) compounds. 4) Good and bad fingerprints predicted by ECFP-2. 5) The Surfex docked (1NRL) conformations of newly identified PXR activators or an antagonist.

**Supplemental Results 1. The effects of different descriptors on predictive performance of Bayesian models.** The effects of using topological descriptors and different fingerprints, *i.e.*, ECFP\_6 and FCFP\_6 on the predictive performance of the Bayesian models are demonstrated in Table 1. Using fingerprint ECFP\_6 is advantageous over FCFP\_6 in terms of XV ROC AUC values, when comparing ECFP-1 and FCFP-1 (87.0 vs 85.2%) and ECFP-2 and FCFP-2 (87.7 vs. 86.4%). When it comes to the test set compounds, using ECFP\_6 instead of FCFP\_6 seemed to be favorable for specificity but unfavorable for sensitivity, when we compare ECFP-1 vs FCFP-1 (87.3 vs 82.5% for SP and 45.1 vs 58.5% for SE) and ECFP-2 vs FCFP-2 (92.1 vs 87.3% for SP and 35.4 vs

40.2% for SE). Using topological descriptors seems of no benefit to predictive performance validated by training set compounds, indicated with lower XV ROC AUC values of ECFP\_1 than ECFP\_2 (87.0 vs 87.7%) and FCFP\_1 than FCFP\_2 (85.2 vs 86.4%). In light of test set compounds, using more descriptors is helpful in improving SE, when comparing ECFP\_1 and ECFP\_2 (45.1 vs 35.4%) and FCFP\_1 and FCFP\_2 (58.5 vs 40.2%), but could be detrimental to SP, when comparing ECFP-1 vs ECFP-2 (87.3 vs 92.1%) and FCFP-1 vs FCFP-2 (82.5 vs 87.3%). In terms of overall predictive capacity, models built with more topological descriptors (ECFP-1 and FCFP1) demonstrated higher Q and C values than their counterparts with less descriptors, as shown in Table 1 when comparing ECFP-1 with ECFP-2 and FCFP-1 with FCFP-2.

**Supplemental Results 2. Results of database filtering with FlexX and Surflex.** The docking programs were used to identify and exclude non-activators with bulky size or unfavorable binding energies. First, 82 hPXR activators and 63 hPXR nonactivators in the test set were docked into the active site of hPXR. The best poses selected based on the most favorable FlexX (binding energy, in kcal/mol) or Surflex score ( $-\text{Log}K_d$ ) were generated. Since a binding score threshold for identifying hPXR activators and nonactivators did not work well previously (Ekins et al., 2008; Khandelwal et al., 2008; Yasuda et al., 2008; Kortagere et al., 2009), we applied only a standard filter of docked/undocked (FlexX) and a rather low cutoff score (Surflex) to identify hPXR nonactivators with unfavorable binding (Supplemental Information). Ten compounds failed to fit in the active site by FlexX, three compounds were docked outside of the binding pocket (some of them with positive binding energies), and one compound with positive binding energy docked inside the LBD. Since docking with FlexX only considers

residues within the defined active site, compounds docked outside of the active site should be regarded as unsuccessful. As a result, 14 drugs were discarded by FlexX. Surfex identified six compounds with scores below 2, indicating poor binding affinity, and all of these unsuccessfully docked with FlexX. The combined results from FlexX and Surfex indicate six molecules to be hPXR nonactivators. However, three are actually hPXR activators and another three are nonactivators. On the basis of data distribution, the probability of randomly selecting a PXR nonactivator is  $63/(63+82) = 0.43$ , whereas the ratio of the nonactivators among the six compounds is 0.5. Thus, FlexX and Surfex appear to have some ability for initial exclusion of nonactivators, especially those with bulky or rigid structures and unfavorable binding energies. The fact that some activators failed to dock the LBD could be explained by the rigid treatment of the protein which is flexible in reality.

Among the 550 SCUT compounds that were docked into the hPXR-LBD, 31 failed to fit in the active site (FlexX). Additionally, 12 compounds were docked outside the active site (some with positive binding energies) and 3 had a positive FlexX score but were docked inside of the binding pocket. Overall, docking of 46 drugs was unsuccessful by FlexX. With Surfex, 17 compounds had scores below zero and 4 compounds had Surfex scores between 0 and 2. The low Surfex scores of these compounds indicated possible poor binding to hPXR. Among 17 compounds with negative Surfex scores, only two were docked successfully by FlexX. Nevertheless, all were excluded from the next screening step.

**Supplemental Table S1** Test set compound (n = 145) scores based on Bayesian models, FlexX and Surflex.

| Index * | Name                 | ECFP-1 | FCFP-1 | ECFP-2 | FCFP-2 | Activation ** | FlexX (kcal/mol) | FlexX Note* ** | Surflex (-logKd) | Exclusion**** |
|---------|----------------------|--------|--------|--------|--------|---------------|------------------|----------------|------------------|---------------|
| 1       | reserpine            | -14.48 | -17.78 | -14.58 | -17.88 | a             | 1.58             | o              | -28.64           | y             |
| 2       | Structure6617        | 13.52  | 2.74   | 18.05  | 7.27   | a             | x                |                | -17.06           | y             |
| 3       | Structure662         | 2.03   | -4.13  | 5.84   | -0.32  |               | x                |                | -7.49            | y             |
| 4       | Structure6625        | 27.01  | 17.88  | 31.67  | 22.54  | a             | 4.12             | o              | -3.28            | y             |
| 5       | Structure2850        | 4.93   | -0.20  | 8.89   | 3.75   |               | 14.01            | o              | -2.48            | y             |
| 6       | Structure1727        | 2.65   | -1.55  | 6.36   | 2.17   |               | x                |                | 1.49             | y             |
| 7       | Estriol              | 2.25   | 2.38   | 2.62   | 2.74   | a             | -15.78           |                | 2.23             |               |
| 8       | Structure3018        | -2.36  | -4.69  | -1.17  | -3.50  | a             | x                |                | 2.61             |               |
| 9       | Structure5033        | -4.31  | -10.42 | -4.96  | -11.06 | a             | -16.03           |                | 2.91             |               |
| 10      | Structure4226        | -15.30 | -15.29 | -12.06 | -12.05 |               | -16.65           |                | 3.14             |               |
| 11      | Etiocholanolone      | 12.44  | 9.49   | 9.63   | 6.68   | a             | -9.44            |                | 3.44             |               |
| 12      | Structure1695        | -3.07  | -4.34  | -5.28  | -6.55  |               | -17.3            |                | 3.47             |               |
| 13      | CDD3501              | -3.37  | -1.81  | -1.85  | -0.29  | a             | -12.21           |                | 3.47             |               |
| 14      | Structure2076        | -3.22  | -2.96  | -3.89  | -3.63  |               | -19.83           |                | 3.49             |               |
| 15      | Structure5049        | -2.59  | -4.81  | -2.39  | -4.60  |               | -11.66           |                | 3.55             |               |
| 16      | CDD3543              | -2.92  | 0.72   | -5.29  | -1.64  | a             | -14.89           |                | 3.57             |               |
| 17      | Structure2013        | -8.48  | -11.25 | -3.63  | -6.40  | a             | -5.57            |                | 3.62             |               |
| 18      | Structure1441        | -5.03  | -4.92  | -7.61  | -7.49  | a             | -15.92           |                | 3.66             |               |
| 19      | Structure47          | -4.97  | -4.37  | -0.51  | 0.10   |               | -14.61           |                | 3.67             |               |
| 20      | Structure3479        | -15.53 | -18.04 | -7.96  | -10.46 |               | -15.97           |                | 3.67             |               |
| 21      | forskolin            | 5.47   | 4.74   | 3.20   | 2.47   | a             | -6.92            |                | 3.82             |               |
| 22      | 5_Pregnan_3_20_diol  | 8.90   | 7.20   | 5.07   | 3.37   | a             | x                |                | 3.83             |               |
| 23      | Structure2693        | -8.59  | -10.65 | -5.75  | -7.81  | a             | -13.72           |                | 3.9              |               |
| 24      | Structure4923        | -26.53 | -22.30 | -24.12 | -19.89 | a             | -17.55           |                | 3.93             |               |
| 25      | Estrone              | 7.91   | 6.11   | 9.06   | 7.27   | a             | -11.15           |                | 4.09             |               |
| 26      | Structure1280        | -7.99  | -5.28  | -8.74  | -6.02  | a             | -18.33           |                | 4.1              |               |
| 27      | CDD3532              | 1.23   | 2.30   | -2.38  | -1.31  | a             | -13.15           |                | 4.14             |               |
| 28      | Structure3360        | -8.42  | -7.42  | -7.12  | -6.13  | a             | -14.62           |                | 4.17             |               |
| 29      | Structure2937        | -0.59  | -1.98  | 2.37   | 0.99   |               | -16.29           |                | 4.24             |               |
| 30      | petromyzonol         | -29.65 | -15.15 | -31.68 | -17.18 |               | -0.93            |                | 4.32             |               |
| 31      | Structure7424        | -12.62 | -13.64 | -8.41  | -9.44  |               | -15.18           |                | 4.4              |               |
| 32      | Structure4893        | -11.09 | -9.97  | -7.72  | -6.59  |               | -11.12           |                | 4.45             |               |
| 33      | 1-9-dideoxydorskolin | 4.92   | 4.14   | 2.07   | 1.29   | a             | -11.21           |                | 4.48             |               |
| 34      | Structure4621        | -20.93 | -11.47 | -21.31 | -11.85 | a             | -29.13           |                | 4.49             |               |
| 35      | Structure7753        | -33.52 | -27.66 | -30.47 | -24.60 | a             | -17.52           |                | 4.56             |               |
| 36      | Structure5172        | -3.35  | -6.36  | -2.66  | -5.66  |               | -16.93           |                | 4.61             |               |
| 37      | CDD3540              | -1.63  | 1.75   | -4.89  | -1.51  | a             | -14.84           |                | 4.62             |               |
| 38      | Structure4308        | -3.85  | -5.04  | -7.43  | -8.62  |               | -20.76           |                | 4.65             |               |
| 39      | CDD3530              | 2.34   | 1.49   | -1.27  | -2.12  | a             | -12.92           |                | 4.65             |               |
| 40      | phenylbutazone       | -14.36 | -12.13 | -5.36  | -3.12  | a             | -18.21           |                | 4.72             |               |
| 41      | Structure7565        | -10.49 | -8.38  | -6.72  | -4.61  |               | -15.22           |                | 4.77             |               |
| 42      | Structure5608        | -18.44 | -10.25 | -15.29 | -7.11  | a             | -24.82           |                | 4.79             |               |

## DMD #35808

|    |                               |        |        |        |        |   |        |  |      |  |
|----|-------------------------------|--------|--------|--------|--------|---|--------|--|------|--|
| 43 | Structure2326                 | -9.60  | -10.94 | -8.11  | -9.46  | a | -16.9  |  | 4.81 |  |
| 44 | Structure2616                 | 3.05   | 2.97   | -0.16  | -0.24  |   | x      |  | 4.83 |  |
| 45 | Structure7204                 | -10.00 | -13.58 | -7.54  | -11.12 |   | -14.17 |  | 4.85 |  |
| 46 | Structure7340                 | -6.14  | -4.10  | -6.48  | -4.44  |   | -21.64 |  | 4.92 |  |
| 47 | CDD3508                       | 2.43   | 4.84   | -0.82  | 1.59   | a | -13.19 |  | 4.95 |  |
| 48 | Structure1115                 | -8.74  | -9.06  | -5.68  | -6.00  | a | -17.58 |  | 4.99 |  |
| 49 | Structure8134                 | -12.43 | -14.66 | -7.91  | -10.14 | a | -18.29 |  | 5    |  |
| 50 | Allocholicacid                | -30.57 | -14.30 | -31.57 | -15.30 |   | -4.07  |  | 5.01 |  |
| 51 | CDD3538                       | -2.42  | 1.23   | -5.80  | -2.16  | a | -14.91 |  | 5.04 |  |
| 52 | Muricholicacid                | -2.80  | -1.51  | -5.12  | -3.83  | a | -6.72  |  | 5.07 |  |
| 53 | 5beta-Cholan-3 7 12 24-tetrol | -29.65 | -15.15 | -31.68 | -17.18 |   | -7.62  |  | 5.08 |  |
| 54 | Structure4429                 | -5.90  | -5.66  | -11.40 | -11.16 | a | -18.11 |  | 5.09 |  |
| 55 | 5beta_Androstan-3alph_ol      | 11.15  | 7.94   | 8.62   | 5.41   | a | -10.7  |  | 5.12 |  |
| 56 | c2ba-11                       | -2.93  | -6.60  | -3.99  | -7.65  |   | -20.41 |  | 5.14 |  |
| 57 | Structure373                  | -35.53 | -31.57 | -23.98 | -20.02 |   | -15.1  |  | 5.19 |  |
| 58 | Structure1271                 | -6.90  | -7.27  | -3.53  | -3.90  |   | -17.74 |  | 5.19 |  |
| 59 | 16_5a_Androsten-3b-ol         | 5.18   | 5.57   | 3.13   | 3.53   | a | -11.06 |  | 5.22 |  |
| 60 | Structure3348                 | -7.24  | -6.62  | -7.53  | -6.90  | a | -14.19 |  | 5.26 |  |
| 61 | Structure5661                 | -4.19  | -8.76  | -5.63  | -10.20 |   | -15.3  |  | 5.31 |  |
| 62 | Structure5237                 | -13.26 | -15.03 | -8.27  | -10.04 |   | -15.64 |  | 5.32 |  |
| 63 | Structure7940                 | -6.86  | -5.45  | -2.86  | -1.45  | a | -9.24  |  | 5.33 |  |
| 64 | Structure3256                 | -20.52 | -20.64 | -12.48 | -12.60 |   | -15.2  |  | 5.35 |  |
| 65 | 5alpha_Androstan-3beta_ol     | 11.15  | 7.94   | 8.62   | 5.41   | a | -11.31 |  | 5.35 |  |
| 66 | Structure3695                 | -8.98  | -6.55  | -11.92 | -9.49  | a | -18.32 |  | 5.38 |  |
| 67 | Structure7627                 | -3.61  | -2.33  | -0.79  | 0.50   |   | -21.11 |  | 5.38 |  |
| 68 | Structure2999                 | -20.97 | -23.45 | -12.02 | -14.50 |   | -12.92 |  | 5.4  |  |
| 69 | Structure3852                 | -5.73  | -6.59  | -2.26  | -3.12  |   | -11.39 |  | 5.42 |  |
| 70 | Structure6374                 | -13.28 | -10.81 | -9.48  | -7.00  |   | -21.34 |  | 5.46 |  |
| 71 | 17beta-dihydroandrosterone    | 10.30  | 8.08   | 8.86   | 6.64   | a | -11.49 |  | 5.47 |  |
| 72 | c2ba-10                       | -7.32  | -6.24  | -8.50  | -7.42  | a | -20.38 |  | 5.47 |  |
| 73 | Structure1639                 | -13.90 | -14.59 | -11.05 | -11.74 |   | -18.1  |  | 5.5  |  |
| 74 | Structure3532                 | -10.08 | -8.03  | -6.00  | -3.95  |   | -14.83 |  | 5.5  |  |
| 75 | CDD3536                       | 2.36   | 5.35   | -1.58  | 1.41   | a | -14.57 |  | 5.52 |  |
| 76 | Structure3083                 | 8.34   | 4.99   | 8.88   | 5.52   | a | -18.78 |  | 5.55 |  |
| 77 | 12_Ketolithocholicacid        | -0.07  | 1.49   | -1.71  | -0.15  | a | -14.8  |  | 5.58 |  |
| 78 | mevastatin                    | 21.74  | 18.42  | 16.38  | 13.07  | a | -7.72  |  | 5.65 |  |
| 79 | c2ba-251                      | -3.36  | -3.38  | -4.12  | -4.14  | a | -24.39 |  | 5.69 |  |
| 80 | c2ba-6                        | 1.71   | 2.99   | -3.63  | -2.36  | a | -20.65 |  | 5.74 |  |
| 81 | Structure2611                 | -36.45 | -31.95 | -23.42 | -18.92 |   | -20.49 |  | 5.75 |  |
| 82 | Estetrol                      | 1.16   | 0.97   | 0.55   | 0.37   | a | -16.71 |  | 5.75 |  |
| 83 | Epitestosterone_sulfate       | 17.32  | 14.43  | 12.08  | 9.19   | a | -6.21  |  | 5.75 |  |
| 84 | Structure4196                 | -7.17  | -3.83  | -7.93  | -4.59  |   | -20.22 |  | 5.76 |  |
| 85 | Structure5533                 | -14.68 | -15.06 | -11.12 | -11.51 | a | -17.94 |  | 5.8  |  |

## DMD #35808

|     |                            |        |        |        |        |   |        |  |      |  |
|-----|----------------------------|--------|--------|--------|--------|---|--------|--|------|--|
| 86  | Structure4360              | -9.98  | -7.33  | -8.40  | -5.75  |   | -17.4  |  | 5.81 |  |
| 87  | dihydrotestosterone        | 17.90  | 12.65  | 16.32  | 11.07  | a | -11.48 |  | 5.83 |  |
| 88  | Structure5110              | -4.26  | -7.96  | -2.77  | -6.47  | a | -13.68 |  | 5.88 |  |
| 89  | Cortolone                  | 6.79   | 4.28   | 3.11   | 0.60   | a | -12.07 |  | 5.91 |  |
| 90  | Structure3058              | -1.81  | -4.50  | -0.93  | -3.61  |   | -20.08 |  | 6.06 |  |
| 91  | Structure7343              | -16.16 | -18.28 | -10.83 | -12.95 | a | -19.02 |  | 6.08 |  |
| 92  | Structure4879              | -4.89  | -6.70  | -1.83  | -3.64  |   | -18.04 |  | 6.1  |  |
| 93  | c2ba-13                    | 2.41   | 1.23   | -2.33  | -3.51  | a | -23.84 |  | 6.14 |  |
| 94  | Structure5147              | 5.73   | -1.84  | 0.75   | -6.83  | a | -12.84 |  | 6.16 |  |
| 95  | Structure2415              | -13.02 | -5.28  | -15.75 | -8.01  | a | -16.5  |  | 6.18 |  |
| 96  | Structure1081              | 11.67  | 11.64  | 11.18  | 11.15  | a | -12.53 |  | 6.2  |  |
| 97  | Structure5114              | -16.52 | -15.19 | -9.36  | -8.03  |   | -17.87 |  | 6.2  |  |
| 98  | Structure4239              | -12.96 | -13.00 | -13.90 | -13.95 | a | -17.47 |  | 6.21 |  |
| 99  | c2ba-3                     | -11.12 | -9.08  | -9.39  | -7.34  |   | -22.14 |  | 6.23 |  |
| 100 | Structure168               | -11.04 | -10.00 | -6.78  | -5.75  |   | -11.5  |  | 6.29 |  |
| 101 | Structure3372              | -10.40 | -10.37 | -13.18 | -13.15 | a | -15.4  |  | 6.34 |  |
| 102 | Structure377               | 8.98   | 6.60   | 5.29   | 2.90   | a | -20.39 |  | 6.45 |  |
| 103 | Structure4563              | -0.72  | -3.98  | -5.15  | -8.41  | a | -18.34 |  | 6.48 |  |
| 104 | Structure7655              | -6.93  | -8.39  | -7.07  | -8.52  |   | -18.86 |  | 6.49 |  |
| 105 | Structure6521              | -2.00  | -2.76  | -5.69  | -6.45  | a | -14.3  |  | 6.55 |  |
| 106 | Structure112               | -7.79  | -6.93  | -4.82  | -3.96  |   | -13.45 |  | 6.58 |  |
| 107 | Structure2749              | 1.23   | 0.16   | -1.71  | -2.78  |   | -15.55 |  | 6.59 |  |
| 108 | Structure5753              | -8.40  | -11.68 | -6.43  | -9.72  |   | -16.75 |  | 6.6  |  |
| 109 | c2ba-7                     | -7.25  | -3.77  | -8.91  | -5.43  | a | -29.13 |  | 6.67 |  |
| 110 | c2ba-8                     | -3.96  | -7.45  | -4.07  | -7.55  | a | -14.61 |  | 6.68 |  |
| 111 | Structure2608              | -9.56  | -6.12  | -8.48  | -5.04  |   | -20.54 |  | 6.7  |  |
| 112 | bergamottin                | 6.15   | 3.10   | 6.61   | 3.56   | a | -12.46 |  | 6.71 |  |
| 113 | Structure2180              | -42.77 | -33.39 | -32.99 | -23.61 |   | -13.51 |  | 6.76 |  |
| 114 | Structure5085              | -10.53 | -8.60  | -4.48  | -2.55  |   | -13.67 |  | 6.78 |  |
| 115 | Structure7175              | -14.60 | -20.17 | -10.60 | -16.18 |   | -20.57 |  | 6.84 |  |
| 116 | Structure1564              | -46.40 | -39.23 | -38.77 | -31.59 |   | -16.82 |  | 6.91 |  |
| 117 | Structure6881              | 18.63  | 14.30  | 16.31  | 11.98  | a | 6.3    |  | 6.91 |  |
| 118 | Structure4151              | -4.61  | -4.91  | 0.78   | 0.47   | a | -20.92 |  | 6.97 |  |
| 119 | Structure7965              | -8.74  | -10.91 | -4.26  | -6.43  |   | -9.18  |  | 7.03 |  |
| 120 | Structure7687              | -2.74  | -3.67  | -4.75  | -5.69  | a | -18.07 |  | 7.04 |  |
| 121 | Structure6704              | 0.73   | -1.59  | 3.87   | 1.55   | a | -23.34 |  | 7.07 |  |
| 122 | Taurochenodeoxycholic acid | -28.55 | -17.72 | -28.46 | -17.64 |   | x      |  | 7.12 |  |
| 123 | Lithocholic acid           | 6.77   | 6.96   | 2.45   | 2.64   | a | x      |  | 7.21 |  |
| 124 | Structure6556              | -12.35 | -11.72 | -9.57  | -8.94  |   | -17.57 |  | 7.27 |  |
| 125 | Tauro-b-muricholic acid    | -23.23 | -16.57 | -22.10 | -15.44 |   | -10.39 |  | 7.31 |  |
| 126 | Structure583               | -6.74  | -9.06  | -3.90  | -6.22  |   | -11.64 |  | 7.32 |  |
| 127 | Structure6490              | -7.01  | -5.07  | -5.89  | -3.95  | a | -16.77 |  | 7.45 |  |
| 128 | c2ba-12                    | 2.45   | -0.83  | -0.09  | -3.37  |   | -21.18 |  | 7.59 |  |
| 129 | Structure4376              | -1.40  | -3.32  | -4.59  | -6.51  |   | -17.24 |  | 7.6  |  |
| 130 | 7_Ketolithocholic acid     | -0.97  | 0.70   | -2.58  | -0.91  | a | -11.02 |  | 7.64 |  |
| 131 | Structure3194              | -11.57 | -9.31  | -13.69 | -11.43 |   | x      |  | 7.66 |  |

|     |                        |        |        |        |        |   |        |  |      |  |
|-----|------------------------|--------|--------|--------|--------|---|--------|--|------|--|
| 132 | c2ba-9                 | -9.77  | -14.22 | -7.53  | -11.99 |   | -19.87 |  | 7.69 |  |
| 133 | Structure1574          | 6.07   | 9.45   | 0.58   | 3.96   |   | x      |  | 7.73 |  |
| 134 | Structure6052          | 2.81   | -0.27  | 4.71   | 1.63   | a | -18.37 |  | 7.78 |  |
| 135 | Structure5251          | 6.40   | 2.69   | 5.15   | 1.45   | a | -23.23 |  | 7.79 |  |
| 136 | Structure5528          | -9.09  | -10.95 | -9.53  | -11.39 | a | -20.12 |  | 7.79 |  |
| 137 | c2ba-248               | -1.44  | -1.90  | -1.22  | -1.68  | a | -19    |  | 7.85 |  |
| 138 | Lithocholicacidacetate | 3.75   | 4.06   | 1.56   | 1.88   | a | -7.1   |  | 7.9  |  |
| 139 | Structure6648          | -14.10 | -20.23 | -14.38 | -20.50 |   | -16.14 |  | 8.03 |  |
| 140 | Structure6869          | -9.01  | -14.96 | -10.70 | -16.65 | a | -17.66 |  | 8.06 |  |
| 141 | Structure8138          | -15.63 | -22.47 | -7.84  | -14.67 |   | -17.45 |  | 8.15 |  |
| 142 | c2ba-5                 | -5.41  | -5.65  | -4.80  | -5.04  | a | -1.41  |  | 8.16 |  |
| 143 | Structure6541          | -5.14  | -13.67 | -5.16  | -13.68 | a | -15.39 |  | 8.4  |  |
| 144 | Structure7944          | -13.35 | -8.57  | -11.75 | -6.97  |   | -19.87 |  | 8.74 |  |
| 145 | Structure3577          | -9.01  | -3.72  | -9.90  | -4.61  | a | -18.54 |  | 8.81 |  |

\*: Drug ranked according to Surflex scores.

\*\*：“a” indicates an hPXR activator. Otherwise the compound is an hPXR nonactivator.

\*\*\*：“o” indicates the drug was docked outside of binding pocket. “+” indicates the drug has a positive score.

\*\*\*\*：“y” means the compound is predicted to be an hPXR nonactivator.

**Supplemental Table S2** SCUT database compound (n = 550) scores based on Bayesian models, FlexX and Surflex.

| Index* | scut ID     | name                   | ECFP-2 | FlexX  | FlexX note** | Surflex | note2*** | Exclusion**** |
|--------|-------------|------------------------|--------|--------|--------------|---------|----------|---------------|
| 1      | scut0006623 | rifampin               | 27.54  | 8.25   | o            | -19.29  | b        | y             |
| 2      | scut0002209 | dexamethasone          | 25.66  | x      |              | 5.1     | s        |               |
| 3      | scut0006992 | spironolactone         | 25.20  | -8.13  |              | 5.37    | s        |               |
| 4      | scut0004451 | lovastatin             | 24.01  | -4.90  |              | 6.48    | s        |               |
| 5      | scut0000714 | beclometasone          | 21.20  | x      |              | 3.91    |          |               |
| 6      | scut0004590 | medroxyprogesterone    | 19.93  | -9.96  |              | 4.26    | c        |               |
| 7      | scut0006637 | rimexolone             | 19.48  | -12.35 |              | 5.04    |          |               |
| 8      | scut0002815 | eplerenone             | 19.40  | -16.74 |              | 6.67    |          |               |
| 9      | scut0006883 | simvastatin            | 19.16  | -3.63  |              | 6.9     | s        |               |
| 10     | scut0007744 | triamcinolone          | 19.05  | x      |              | 4.46    |          |               |
| 11     | scut0004606 | megestrol acetate      | 18.56  | -10.89 |              | 5.91    |          |               |
| 12     | scut0004158 | isradipine             | 17.22  | -21.58 |              | 5.64    | s        |               |
| 13     | scut0006657 | ritonavir              | 17.14  | x      |              | 7.68    | s        |               |
| 14     | scut0003266 | fludrocortisone        | 16.43  | x      |              | 4.05    |          |               |
| 15     | scut0003362 | fluticasone propionate | 15.72  | x      |              | 6.25    |          |               |
| 16     | scut0003324 | fluoxymesterone        | 15.33  | x      |              | 3.43    |          |               |
| 17     | scut0005882 | permethrin             | 14.88  | -14.27 |              | 7.26    | b        |               |
| 18     | scut0002882 | estramustine           | 11.65  | -7.84  |              | 4.53    |          |               |
| 19     | scut0007237 | tamoxifen              | 11.38  | -18.96 |              | 8.07    | s        |               |
| 20     | scut0001081 | budesonide             | 10.75  | -13.72 |              | 6.72    | s        |               |
| 21     | scut0003205 | finasteride            | 10.49  | -15.09 |              | 6.47    |          |               |
| 22     | scut0006240 | pravastatin            | 10.23  | -5.62  |              | 7.32    | b        |               |
| 23     | scut0005336 | nisoldipine            | 10.14  | -20.65 |              | 5.19    |          |               |
| 24     | scut0007137 | sulfinpyrazone         | 9.89   | -22.81 |              | 6.56    | s        |               |
| 25     | scut0003295 | flunisolide            | 9.85   | -16.72 |              | 4.8     |          |               |
| 26     | scut0005252 | nicardipine            | 9.76   | -25.07 |              | 7.62    | s        |               |
| 27     | scut0000377 | amlodipine             | 9.70   | -20.26 |              | 7.47    | s        |               |
| 28     | scut0002872 | estradiol              | 9.47   | -11.16 |              | 5.78    | b        |               |
| 29     | scut0003083 | felodipine             | 8.78   | -17.45 |              | 5.48    | s        |               |
| 30     | scut0005928 | phenobarbital          | 8.60   | -18.03 |              | 5.09    | s        |               |
| 31     | scut0004490 | lopinavir              | 8.53   | x      |              | 10.05   |          |               |
| 32     | scut0005839 | pentobarbital          | 8.12   | -16.53 |              | 5.87    | s        |               |
| 33     | scut0004977 | mitomycin              | 8.09   | -16.19 |              | 4.1     |          |               |
| 34     | scut0005325 | nimodipine             | 7.99   | -20.96 |              | 7.63    |          |               |
| 35     | scut0000017 | acarbose               | 7.68   | 2.39   | +            | 7.66    |          |               |
| 36     | scut0001413 | cefoxitin              | 7.52   | -17.57 |              | 5.11    |          |               |
| 37     | scut0005149 | naltrexone             | 7.36   | -13.73 |              | 5.64    |          |               |
| 38     | scut0001867 | clotrimazole           | 7.30   | -16.21 |              | 3.34    | s        |               |
| 39     | scut0000329 | amikacin               | 7.23   | -16.75 |              | 7.73    |          |               |
| 40     | scut0000341 | aminoglutethimide      | 7.12   | -18.58 |              | 6.63    |          |               |
| 41     | scut0005970 | phenytoin              | 6.81   | -16.98 |              | 4.71    | s        |               |
| 42     | scut0007627 | tobramycin             | 6.43   | -15.93 |              | 7.78    |          |               |
| 43     | scut0007063 | sufentanil             | 6.38   | -16.04 |              | 6.85    |          |               |



## DMD #35808

|    |             |                       |      |        |   |        |   |   |
|----|-------------|-----------------------|------|--------|---|--------|---|---|
| 44 | scut0007124 | sulfasalazine         | 6.31 | -26.28 |   | 6.81   |   |   |
| 45 | scut0001574 | cholecalciferol       | 6.26 | -1.58  |   | 4.61   | s |   |
| 46 | scut0001928 | cortisone             | 6.16 | -11.74 |   | 5.09   | s |   |
| 47 | scut0006816 | secobarbital          | 6.09 | -11.54 |   | 5.53   |   |   |
| 48 | scut0006788 | saquinavir            | 5.94 | x      |   | 9.35   | s |   |
| 49 | scut0007687 | topiramate            | 5.89 | x      |   | 5.62   | s |   |
| 50 | scut0001178 | butorphanol           | 5.83 | -11.96 |   | 4.7    |   |   |
| 51 | scut0001753 | clindamycin           | 5.56 | -12.85 |   | 6.93   |   |   |
| 52 | scut0001418 | cefpodoxime           | 5.47 | -20.80 |   | 4.85   |   |   |
| 53 | scut0005142 | nalbuphine            | 5.41 | -12.91 |   | 4.32   |   |   |
| 54 | scut0007037 | streptomycin          | 5.38 | -12.13 |   | 7.98   |   |   |
| 55 | scut0001429 | ceftibuten            | 5.24 | -18.25 |   | 5.81   |   |   |
| 56 | scut0004066 | ipratropium bromide   | 5.17 | -17.81 |   | 6.11   |   |   |
| 57 | scut0005148 | naloxone              | 5.16 | -12.95 |   | 4.8    | s |   |
| 58 | scut0004706 | meropenem             | 5.06 | -17.27 |   | 6.94   |   |   |
| 59 | scut0002616 | doxorubicin           | 4.79 | x      |   | 7.42   | s |   |
| 60 | scut0001433 | ceftizoxime           | 4.65 | -22.38 |   | 4.64   |   |   |
| 61 | scut0006350 | propantheline bromide | 4.46 | -18.97 |   | 6.83   |   |   |
| 62 | scut0006548 | ramipril              | 3.88 | -18.09 |   | 9.59   |   |   |
| 63 | scut0000406 | amprenavir            | 3.86 | -19.91 |   | 9.02   |   |   |
| 64 | scut0005715 | pancuronium bromide   | 3.82 | 10.33  | o | -3.22  |   | y |
| 65 | scut0004564 | meclizine             | 3.74 | -20.39 |   | 5.66   | s |   |
| 66 | scut0002618 | doxycycline           | 3.67 | x      |   | 3.59   |   |   |
| 67 | scut0001436 | cefuroxime            | 3.57 | -19.38 |   | 5.8    |   |   |
| 68 | scut0006059 | pipecuronium bromide  | 3.55 | x      |   | -51.49 |   | y |
| 69 | scut0001387 | cefdinir              | 3.43 | -21.60 |   | 4.75   |   |   |
| 70 | scut0000669 | aztreonam             | 3.25 | -14.58 |   | 6.7    |   |   |
| 71 | scut0000395 | amoxicillin           | 3.23 | -20.23 |   | 6.12   |   |   |
| 72 | scut0007961 | vecuronium bromide    | 3.19 | x      |   | -3.5   |   | y |
| 73 | scut0001895 | colchicine            | 3.18 | -16.37 |   | 5.14   |   |   |
| 74 | scut0001211 | calcitriol            | 3.11 | -11.33 |   | 5.94   |   |   |
| 75 | scut0002085 | daunorubicin          | 3.09 | -14.08 |   | 6.71   |   |   |
| 76 | scut0003420 | fosphenytoin          | 2.97 | -12.39 |   | 6      |   |   |
| 77 | scut0002850 | erythromycin          | 2.96 | x      |   | -2.3   | s | y |
| 78 | scut0008099 | zidovudine            | 2.74 | -18.78 |   | 6.81   |   |   |
| 79 | scut0006053 | pioglitazone          | 2.71 | -21.23 |   | 6.84   | s |   |
| 80 | scut0005877 | perindopril           | 2.66 | -16.76 |   | 7.62   |   |   |
| 81 | scut0002748 | enalapril             | 2.66 | -18.94 |   | 7.32   | s |   |
| 82 | scut0005279 | nifedipine            | 2.65 | -18.62 |   | 5.42   | s |   |
| 83 | scut0007502 | tiagabine             | 2.45 | -20.38 |   | 7.02   |   |   |
| 84 | scut0000847 | bepriidil             | 2.38 | -14.32 |   | 8.06   |   |   |
| 85 | scut0002525 | dirithromycin         | 2.29 | x      |   | -14.96 |   | y |
| 86 | scut0003870 | idarubicin            | 2.24 | -18.55 |   | 5.13   |   |   |
| 87 | scut0001471 | cetirizine            | 2.04 | -17.67 |   | 6.93   |   |   |
| 88 | scut0005195 | nedocromil            | 2.01 | x      |   | 4      |   |   |
| 89 | scut0003217 | flavoxate             | 2.00 | -21.21 |   | 7.27   |   |   |
| 90 | scut0000190 | alfentanil            | 2.00 | -21.43 |   | 7.84   |   |   |

## DMD #35808

|     |             |                          |       |        |   |        |   |   |
|-----|-------------|--------------------------|-------|--------|---|--------|---|---|
| 91  | scut0000595 | atovaquone               | 1.68  | -24.15 |   | 3.78   |   |   |
| 92  | scut0002572 | dofetilide               | 1.64  | -19.10 |   | 9.45   |   |   |
| 93  | scut0007389 | tetracycline             | 1.59  | -17.92 |   | 3.72   |   |   |
| 94  | scut0007526 | ticarcillin              | 1.52  | -15.44 |   | 5.61   |   |   |
| 95  | scut0003809 | hydromorphone            | 1.52  | -12.59 |   | 3.53   |   |   |
| 96  | scut0007239 | tamsulosin               | 1.48  | -21.38 |   | 8.46   |   |   |
| 97  | scut0000662 | azithromycin             | 1.43  | x      |   | -18.62 | s | y |
| 98  | scut0004246 | latanoprost              | 1.38  | -13.63 |   | 7.77   |   |   |
| 99  | scut0001370 | cefadroxil               | 1.35  | -22.59 |   | 5.98   |   |   |
| 100 | scut0002141 | demeclocycline           | 1.30  | x      |   | 3.97   |   |   |
| 101 | scut0007052 | succinylcholine chloride | 1.16  | -9.54  | + | 7.84   |   |   |
| 102 | scut0007612 | tirofiban                | 1.03  | -12.23 |   | 8.15   |   |   |
| 103 | scut0004377 | lisinopril               | 0.84  | -19.41 |   | 8.41   | s |   |
| 104 | scut0001114 | buprenorphine            | 0.66  | x      |   | 5.94   |   |   |
| 105 | scut0006706 | rosiglitazone            | 0.63  | -22.38 |   | 6.86   | s |   |
| 106 | scut0003836 | hydroxyzine              | 0.61  | -17.88 |   | 6.68   |   |   |
| 107 | scut0003139 | fenoprofen               | 0.56  | -17.59 |   | 4.85   |   |   |
| 108 | scut0001409 | cefotaxime               | 0.40  | -19.76 |   | 6.96   |   |   |
| 109 | scut0000957 | bitolterol               | 0.38  | -13.35 |   | 9.29   |   |   |
| 110 | scut0001727 | clarithromycin           | 0.34  | x      |   | -0.25  | s | y |
| 111 | scut0001397 | cefixime                 | 0.21  | -23.89 |   | 3.93   |   |   |
| 112 | scut0005657 | oxybutynin               | 0.15  | -10.82 |   | 8.39   |   |   |
| 113 | scut0003158 | fentanyl                 | 0.11  | -20.43 |   | 7.71   |   |   |
| 114 | scut0002244 | dexrazoxane              | -0.13 | -18.73 |   | 5.49   |   |   |
| 115 | scut0004971 | misoprostol              | -0.48 | -8.98  |   | 7.08   |   |   |
| 116 | scut0003791 | hydrochlorothiazide      | -0.53 | -14.59 |   | 2.87   |   |   |
| 117 | scut0005069 | moxifloxacin             | -0.62 | -19.21 |   | 5.59   |   |   |
| 118 | scut0006972 | sparfloxacin             | -0.66 | -21.28 |   | 7.71   |   |   |
| 119 | scut0007816 | trimethobenzamide        | -0.67 | -16.45 |   | 8.1    |   |   |
| 120 | scut0006764 | salmeterol               | -0.75 | -12.71 |   | 11.07  |   |   |
| 121 | scut0007056 | sucalfate                | -0.75 | 8.92   | + | 4.12   |   |   |
| 122 | scut0001311 | carboplatin              | -0.79 | -12.79 |   | 3.85   |   |   |
| 123 | scut0004309 | levofloxacin             | -0.79 | -20.76 |   | 4.35   | s |   |
| 124 | scut0005506 | ofloxacin                | -0.79 | -20.76 |   | 4.8    |   |   |
| 125 | scut0005051 | morphine                 | -0.85 | -12.65 |   | 4.78   | s |   |
| 126 | scut0006866 | sibutramine              | -0.86 | -9.82  |   | 5.66   |   |   |
| 127 | scut0002937 | ethosuximide             | -0.87 | -16.30 |   | 4.13   | s |   |
| 128 | scut0000404 | ampicillin               | -0.94 | -20.86 |   | 7.01   |   |   |
| 129 | scut0007041 | streptozocin             | -1.00 | -16.63 |   | 4.37   |   |   |
| 130 | scut0005825 | pentazocine              | -1.06 | -12.86 |   | 6.11   |   |   |
| 131 | scut0006543 | raloxifene               | -1.24 | -22.92 |   | 7.31   |   |   |
| 132 | scut0001604 | ciclopirox               | -1.26 | -10.90 |   | 5.02   |   |   |
| 133 | scut0001401 | cefmetazole              | -1.29 | -21.32 |   | 5.34   |   |   |
| 134 | scut0002598 | dorzolamide              | -1.32 | -13.86 |   | 5.07   |   |   |
| 135 | scut0001546 | chlorothiazide           | -1.32 | -13.72 |   | 3.18   |   |   |
| 136 | scut0003018 | etoposide                | -1.34 | x      |   | 4.75   |   |   |
| 137 | scut0004748 | metaxalone               | -1.34 | -18.01 |   | 5.24   |   |   |

## DMD #35808

|     |             |                       |       |        |   |       |  |   |
|-----|-------------|-----------------------|-------|--------|---|-------|--|---|
| 138 | scut0001962 | cromolyn              | -1.37 | -19.62 |   | 7.12  |  |   |
| 139 | scut0005006 | moexipril             | -1.44 | -13.39 |   | 6.98  |  |   |
| 140 | scut0003792 | hydrocodone           | -1.45 | -12.58 |   | 5.27  |  |   |
| 141 | scut0000280 | amantadine            | -1.58 | -4.76  | o | 4.01  |  |   |
| 142 | scut0006523 | rabeprazole sodium    | -1.59 | -16.64 |   | 8.33  |  |   |
| 143 | scut0003058 | famotidine            | -1.67 | -19.67 |   | 6.1   |  |   |
| 144 | scut0006375 | propoxyphene          | -1.67 | -13.30 |   | 6.22  |  |   |
| 145 | scut0007706 | trandolapril          | -1.80 | -14.20 |   | 7.35  |  |   |
| 146 | scut0005669 | oxymorphone           | -1.84 | -13.41 |   | 4.86  |  |   |
| 147 | scut0004520 | mannitol              | -1.89 | -8.71  |   | 3.64  |  |   |
| 148 | scut0004421 | loperamide            | -1.89 | -21.07 |   | 4.83  |  |   |
| 149 | scut0007718 | trazodone             | -1.94 | -17.81 |   | 8.34  |  |   |
| 150 | scut0003523 | gatifloxacin          | -1.99 | -14.16 |   | 4     |  |   |
| 151 | scut0001886 | codeine               | -1.99 | -12.99 |   | 5.45  |  |   |
| 152 | scut0007012 | stavudine             | -2.17 | -13.14 |   | 4.14  |  |   |
| 153 | scut0001410 | cefotetan             | -2.27 | -24.92 |   | 4.38  |  |   |
| 154 | scut0004359 | lindane               | -2.30 | x      |   | 1.51  |  | y |
| 155 | scut0001434 | ceftriaxone           | -2.31 | -23.17 |   | 6.05  |  |   |
| 156 | scut0005079 | mupirocin             | -2.38 | -13.59 |   | 10.15 |  |   |
| 157 | scut0005578 | oxacillin             | -2.48 | -24.81 |   | 5.5   |  |   |
| 158 | scut0003219 | flecainide            | -2.53 | -15.46 |   | 6.9   |  |   |
| 159 | scut0005788 | penciclovir           | -2.53 | -15.32 |   | 5.8   |  |   |
| 160 | scut0004910 | mezlocillin           | -2.59 | -18.40 |   | 5.09  |  |   |
| 161 | scut0001426 | ceftazidime           | -2.63 | -15.00 |   | 4.41  |  |   |
| 162 | scut0005662 | oxycodone             | -2.69 | x      |   | 5.3   |  |   |
| 163 | scut0001388 | cefditoren            | -2.73 | -20.19 |   | 6.53  |  |   |
| 164 | scut0005362 | nitrofurantoin        | -2.74 | -21.56 |   | 3.96  |  |   |
| 165 | scut0007688 | topotecan             | -2.74 | -19.01 |   | 6.04  |  |   |
| 166 | scut0002589 | dopamine              | -2.74 | -12.42 |   | 5.14  |  |   |
| 167 | scut0001123 | bupirone              | -2.76 | -16.35 |   | 7.92  |  |   |
| 168 | scut0003320 | fluorouracil          | -2.79 | -13.76 |   | 2.32  |  |   |
| 169 | scut0002076 | dapsone               | -2.80 | -19.84 |   | 5.41  |  |   |
| 170 | scut0003260 | fludarabine phosphate | -2.80 | -10.78 |   | 6.53  |  |   |
| 171 | scut0001391 | cefepime              | -2.83 | -19.42 |   | 4.91  |  |   |
| 172 | scut0003411 | fosfomycin            | -2.87 | -7.47  |   | 3.28  |  |   |
| 173 | scut0007629 | tocainide             | -2.93 | -22.15 |   | 4.05  |  |   |
| 174 | scut0000949 | bisoprolol            | -3.05 | -16.31 |   | 8.66  |  |   |
| 175 | scut0006634 | rimantadine           | -3.15 | -8.77  |   | 4.46  |  |   |
| 176 | scut0006388 | propylthiouracil      | -3.16 | -11.71 |   | 3.83  |  |   |
| 177 | scut0004304 | levocabastine         | -3.16 | -9.73  |   | -2.61 |  |   |
| 178 | scut0002333 | dicloxacillin         | -3.22 | -22.02 |   | 6.36  |  |   |
| 179 | scut0003695 | haloperidol           | -3.38 | -17.20 |   | 5.73  |  |   |
| 180 | scut0002532 | disopyramide          | -3.39 | -16.83 |   | 6.65  |  |   |
| 181 | scut0001124 | busulfan              | -3.44 | -7.48  |   | 6.52  |  |   |
| 182 | scut0001706 | cisplatin             | -3.46 | -      |   | 0.67  |  |   |
| 183 | scut0004113 | isoetharine           | -3.51 | -15.35 |   | 7.16  |  |   |
| 184 | scut0002867 | esmolol               | -3.52 | -17.10 |   | 6.37  |  |   |

|     |             |                        |       |        |   |      |  |   |
|-----|-------------|------------------------|-------|--------|---|------|--|---|
| 185 | scut0006065 | piperacillin           | -3.56 | -21.37 |   | 5.79 |  |   |
| 186 | scut0005173 | naproxen               | -3.57 | -17.17 |   | 3.85 |  |   |
| 187 | scut0006871 | sildenafil             | -3.57 | -18.94 |   | 7.09 |  |   |
| 188 | scut0004409 | lomefloxacin           | -3.61 | -18.00 |   | 5.1  |  |   |
| 189 | scut0002508 | dipivefrin             | -3.61 | -11.05 |   | 6.65 |  |   |
| 190 | scut0000271 | altretamine            | -3.63 | -12.61 |   | 3.71 |  |   |
| 191 | scut0001380 | cefazolin              | -3.63 | -23.92 |   | 4.6  |  |   |
| 192 | scut0004836 | methylegonovine        | -3.65 | -20.26 |   | 5.83 |  |   |
| 193 | scut0004381 | lithium carbonate      | -3.68 | -      |   | 1.98 |  |   |
| 194 | scut0006372 | propofol               | -3.71 | -12.44 |   | 4.81 |  |   |
| 195 | scut0000886 | bethanechol chloride   | -3.83 | -12.77 |   | 4.4  |  |   |
| 196 | scut0001736 | clemastine             | -3.87 | -14.08 |   | 6.54 |  |   |
| 197 | scut0004746 | metaraminol            | -3.88 | -15.63 |   | 4.24 |  |   |
| 198 | scut0004832 | methyldopa             | -3.88 | -15.03 |   | 6.14 |  |   |
| 199 | scut0001694 | ciprofloxacin          | -3.90 | -17.60 |   | 5.26 |  |   |
| 200 | scut0002259 | dezocine               | -3.92 | -13.90 |   | 5.66 |  |   |
| 201 | scut0001440 | celecoxib              | -3.97 | -16.42 |   | 5    |  |   |
| 202 | scut0004143 | isosorbide mononitrate | -4.07 | -15.46 |   | 4.44 |  |   |
| 203 | scut0004142 | isosorbide dinitrate   | -4.16 | -14.96 |   | 5.39 |  |   |
| 204 | scut0003243 | floxuridine            | -4.18 | -16.94 |   | 4.95 |  |   |
| 205 | scut0001325 | carisoprodol           | -4.21 | -14.15 |   | 5.74 |  |   |
| 206 | scut0006227 | pramipexole            | -4.23 | -10.92 |   | 4.97 |  |   |
| 207 | scut0006509 | quinidine              | -4.31 | -18.08 |   | 5.3  |  |   |
| 208 | scut0002691 | edrophonium chloride   | -4.33 | -14.58 |   | 4.17 |  |   |
| 209 | scut0001898 | colestipol             | -4.33 | -16.29 | o | 3.55 |  |   |
| 210 | scut0004933 | miglitol               | -4.37 | -14.16 |   | 4.63 |  |   |
| 211 | scut0005111 | nabumetone             | -4.37 | -13.25 |   | 5.22 |  |   |
| 212 | scut0004790 | methimazole            | -4.42 | -6.67  |   | 3.52 |  |   |
| 213 | scut0004671 | meprobamate            | -4.52 | -12.34 |   | 4.64 |  |   |
| 214 | scut0005472 | nitroglycerin          | -4.55 | -10.06 |   | 6.7  |  |   |
| 215 | scut0007151 | sulindac               | -4.55 | -18.20 |   | 3.79 |  |   |
| 216 | scut0000480 | anthralin              | -4.56 | -14.73 |   | 5.13 |  |   |
| 217 | scut0001572 | chlorzoxazone          | -4.57 | -10.78 |   | 3.14 |  |   |
| 218 | scut0002915 | ethambutol             | -4.57 | -14.33 |   | 6.75 |  |   |
| 219 | scut0004197 | ketoprofen             | -4.73 | -23.77 |   | 5.85 |  |   |
| 220 | scut0004151 | isotretinoin           | -4.75 | -21.27 |   | 6.72 |  |   |
| 221 | scut0007736 | tretinoin              | -4.75 | -17.51 |   | 6.2  |  |   |
| 222 | scut0002978 | etidronic acid         | -4.75 | -7.59  |   | 3.36 |  |   |
| 223 | scut0007704 | tramadol               | -4.75 | -12.32 |   | 5.25 |  |   |
| 224 | scut0002816 | epoprostenol           | -4.77 | -8.55  |   | 7.23 |  |   |
| 225 | scut0008072 | zafirlukast            | -4.81 | -27.73 |   | 5.98 |  |   |
| 226 | scut0001494 | chloral hydrate        | -4.91 | -4.89  | o | 1.78 |  | y |
| 227 | scut0005954 | phenylephrine          | -4.91 | -16.50 |   | 4.28 |  |   |
| 228 | scut0002380 | diflunisal             | -4.93 | -16.54 |   | 3.38 |  |   |
| 229 | scut0005033 | montelukast sodium     | -4.95 | -20.09 |   | 7.99 |  |   |
| 230 | scut0005410 | norepinephrine         | -4.97 | -15.25 |   | 4.98 |  |   |
| 231 | scut0003194 | fexofenadine           | -4.98 | -12.69 |   | 7.93 |  |   |

## DMD #35808

|     |             |                 |       |        |   |      |  |  |
|-----|-------------|-----------------|-------|--------|---|------|--|--|
| 232 | scut0002806 | epinephrine     | -5.00 | -14.01 |   | 4.62 |  |  |
| 233 | scut0001450 | cephalexin      | -5.02 | -22.05 |   | 5.2  |  |  |
| 234 | scut0000046 | acetaminophen   | -5.02 | -15.32 |   | 4.4  |  |  |
| 235 | scut0004942 | milrinone       | -5.06 | -13.80 |   | 2.96 |  |  |
| 236 | scut0001301 | carbidopa       | -5.10 | -12.29 |   | 5.43 |  |  |
| 237 | scut0004291 | levamisole      | -5.14 | -12.14 |   | 4.98 |  |  |
| 238 | scut0003576 | glimepiride     | -5.16 | -20.56 |   | 7.77 |  |  |
| 239 | scut0004427 | loracarbef      | -5.16 | -23.73 |   | 6.09 |  |  |
| 240 | scut0007643 | tolazoline      | -5.17 | -12.27 |   | 3.7  |  |  |
| 241 | scut0002634 | dronabinol      | -5.19 | -15.96 |   | 6.61 |  |  |
| 242 | scut0002824 | eprosartan      | -5.20 | -12.52 |   | 6.56 |  |  |
| 243 | scut0002798 | ephedrine       | -5.23 | -14.62 |   | 4.23 |  |  |
| 244 | scut0006427 | pseudoephedrine | -5.23 | -14.61 |   | 4.28 |  |  |
| 245 | scut0006441 | pyrazinamide    | -5.27 | -14.65 |   | 2.81 |  |  |
| 246 | scut0004880 | metoprolol      | -5.32 | -17.11 |   | 6.46 |  |  |
| 247 | scut0005781 | pemirolast      | -5.41 | -15.75 |   | 3.52 |  |  |
| 248 | scut0001369 | cefaclor        | -5.45 | -22.16 |   | 4.98 |  |  |
| 249 | scut0006247 | prazosin        | -5.55 | -25.72 |   | 5.86 |  |  |
| 250 | scut0000050 | acetazolamide   | -5.57 | -14.93 |   | 3.62 |  |  |
| 251 | scut0001004 | brimonidine     | -5.64 | -17.98 |   | 4.12 |  |  |
| 252 | scut0002427 | dimenhydrinate  | -5.66 | -13.97 |   | 6.33 |  |  |
| 253 | scut0002500 | diphenhydramine | -5.66 | -13.91 |   | 5.6  |  |  |
| 254 | scut0007260 | tazarotene      | -5.67 | -10.01 |   | 5.2  |  |  |
| 255 | scut0001404 | cefonicid       | -5.67 | -22.19 |   | 5.36 |  |  |
| 256 | scut0006491 | quinapril       | -5.69 | -21.04 |   | 9.42 |  |  |
| 257 | scut0006825 | selegiline      | -5.73 | -18.66 |   | 4.54 |  |  |
| 258 | scut0007351 | terconazole     | -5.76 | -9.57  |   | 7.26 |  |  |
| 259 | scut0002339 | didanosine      | -5.77 | -14.62 |   | 7.06 |  |  |
| 260 | scut0000412 | amrinone        | -5.86 | -12.89 |   | 4.47 |  |  |
| 261 | scut0004875 | metolazone      | -5.87 | -24.91 |   | 6.21 |  |  |
| 262 | scut0000529 | argatroban      | -5.87 | -25.33 |   | 9.7  |  |  |
| 263 | scut0003852 | ibuprofen       | -5.87 | -13.90 |   | 5.45 |  |  |
| 264 | scut0005240 | niacin          | -5.95 | -9.90  |   | 3.65 |  |  |
| 265 | scut0003136 | fenofibrate     | -5.99 | -21.68 |   | 5.37 |  |  |
| 266 | scut0007081 | sulfacetamide   | -6.00 | -17.76 |   | 4.21 |  |  |
| 267 | scut0001457 | cephradine      | -6.02 | -18.02 |   | 5.49 |  |  |
| 268 | scut0003517 | ganciclovir     | -6.03 | -11.83 |   | 6.5  |  |  |
| 269 | scut0005564 | oseltamivir     | -6.04 | -20.97 |   | 7.93 |  |  |
| 270 | scut0004898 | metyrosine      | -6.04 | -13.09 |   | 5.18 |  |  |
| 271 | scut0003398 | formoterol      | -6.09 | -24.98 |   | 6.24 |  |  |
| 272 | scut0003835 | hydroxyurea     | -6.11 | -9.46  |   | 2.09 |  |  |
| 273 | scut0004430 | loratadine      | -6.14 | -18.20 |   | 5.65 |  |  |
| 274 | scut0004903 | mexiletine      | -6.21 | -14.11 |   | 5.97 |  |  |
| 275 | scut0001405 | cefoperazone    | -6.22 | -16.14 |   | 6.65 |  |  |
| 276 | scut0004561 | mechlorethamine | -6.25 | 0.03   | + | 3.35 |  |  |
| 277 | scut0005124 | nafcillin       | -6.25 | -18.02 |   | 6.6  |  |  |
| 278 | scut0000583 | atenolol        | -6.28 | -19.86 |   | 7.4  |  |  |

## DMD #35808

|     |             |                 |       |        |   |        |   |
|-----|-------------|-----------------|-------|--------|---|--------|---|
| 279 | scut0005817 | pentamidine     | -6.31 | -22.65 |   | 7.81   |   |
| 280 | scut0001616 | cidofovir       | -6.36 | -8.94  |   | 7.69   |   |
| 281 | scut0005711 | pamidronic acid | -6.39 | -8.22  |   | 3.18   |   |
| 282 | scut0008023 | voriconazole    | -6.46 | -14.61 |   | 4.64   |   |
| 283 | scut0000119 | adefovir        | -6.47 | -12.07 |   | 7.52   |   |
| 284 | scut0007458 | thioguanine     | -6.47 | -10.36 |   | 4.2    |   |
| 285 | scut0007342 | terazosin       | -6.56 | -23.71 |   | 5.6    |   |
| 286 | scut0003530 | gemcitabine     | -6.64 | -12.46 |   | 4.69   |   |
| 287 | scut0000884 | betaxolol       | -6.66 | -10.26 |   | 7.9    |   |
| 288 | scut0005622 | oxiconazole     | -6.71 | -15.00 |   | 4.87   |   |
| 289 | scut0006659 | rivastigmin     | -6.71 | -13.81 |   | 4.92   |   |
| 290 | scut0007942 | valproic acid   | -6.72 | -8.98  |   | 4.57   |   |
| 291 | scut0005912 | phenelzine      | -6.75 | -14.03 |   | 4.01   |   |
| 292 | scut0006345 | propafenone     | -6.76 | -20.57 |   | 7.16   |   |
| 293 | scut0004745 | metaproterenol  | -6.78 | -13.20 |   | 4.49   |   |
| 294 | scut0000218 | allopurinol     | -6.81 | -15.62 |   | 3.81   |   |
| 295 | scut0002573 | dolasetron      | -6.83 | -17.61 |   | 4.83   |   |
| 296 | scut0005529 | omeprazole      | -6.84 | -18.14 |   | 6.77   |   |
| 297 | scut0004195 | ketoconazole    | -6.86 | -20.08 |   | 6.63   |   |
| 298 | scut0004712 | mesalamine      | -6.89 | -15.76 |   | 3.96   |   |
| 299 | scut0003504 | galantamine     | -6.91 | -15.14 |   | 4.35   |   |
| 300 | scut0005846 | pentostatin     | -6.92 | -15.15 |   | 5.29   |   |
| 301 | scut0000070 | acetylcysteine  | -6.93 | -11.42 |   | 3.63   |   |
| 302 | scut0003489 | gabapentin      | -6.96 | -6.24  | o | 6.41   |   |
| 303 | scut0003405 | foscarnet       | -7.00 | -7.75  | o | 2.81   |   |
| 304 | scut0007676 | tolterodine     | -7.02 | -15.08 |   | 7.39   |   |
| 305 | scut0004087 | irinotecan      | -7.05 | -2.81  | o | -94.19 | y |
| 306 | scut0007657 | tolmetin        | -7.05 | -19.41 |   | 6.24   |   |
| 307 | scut0001271 | captopril       | -7.06 | -17.95 |   | 3.9    |   |
| 308 | scut0004330 | levorphanol     | -7.15 | -12.49 |   | 4.7    |   |
| 309 | scut0000830 | benztropine     | -7.16 | -20.48 |   | 6.08   |   |
| 310 | scut0004917 | miconazole      | -7.17 | -12.98 |   | 5.33   |   |
| 311 | scut0007349 | terbutaline     | -7.21 | -14.75 |   | 5.43   |   |
| 312 | scut0005380 | nizatidine      | -7.21 | -17.44 |   | 6.95   |   |
| 313 | scut0002521 | dipyridamole    | -7.32 | x      |   | 6.76   |   |
| 314 | scut0004199 | ketorolac       | -7.33 | -23.06 |   | 7.13   |   |
| 315 | scut0003348 | flurbiprofen    | -7.38 | -19.63 |   | 4      |   |
| 316 | scut0007966 | venlafaxine     | -7.41 | -9.08  |   | 5.07   |   |
| 317 | scut0006230 | pramoxime       | -7.42 | -12.63 |   | 6.97   |   |
| 318 | scut0004808 | methoxamine     | -7.43 | -17.51 |   | 5.47   |   |
| 319 | scut0008130 | zoledronic acid | -7.49 | -10.29 |   | 4      |   |
| 320 | scut0001251 | candesartan     | -7.54 | -27.72 |   | 7.51   |   |
| 321 | scut0002637 | droperidol      | -7.56 | -26.85 |   | 6.85   |   |
| 322 | scut0004761 | metformin       | -7.64 | -13.65 |   | 3.78   |   |
| 323 | scut0004653 | meperidide      | -7.68 | -22.76 |   | 9.15   |   |
| 324 | scut0002050 | dacarbazine     | -7.70 | -18.93 |   | 4.98   |   |
| 325 | scut0007969 | verapamil       | -7.75 | -17.06 |   | 8.56   |   |

## DMD #35808

|     |             |                       |       |        |   |       |  |  |
|-----|-------------|-----------------------|-------|--------|---|-------|--|--|
| 326 | scut0000112 | acyclovir             | -7.87 | -12.11 |   | 7.35  |  |  |
| 327 | scut0001903 | colfosceril palmitate | -7.95 | 20.17  | o | 12.26 |  |  |
| 328 | scut0006969 | sotalol               | -7.96 | -15.08 |   | 7.61  |  |  |
| 329 | scut0003359 | flutamide             | -8.00 | -18.84 |   | 3.48  |  |  |
| 330 | scut0007820 | trimetrexate          | -8.08 | x      |   | 7.24  |  |  |
| 331 | scut0000122 | adenosine             | -8.14 | -13.72 |   | 5.55  |  |  |
| 332 | scut0004346 | lidocaine             | -8.20 | -21.38 |   | 6.01  |  |  |
| 333 | scut0008079 | zanamivir             | -8.24 | -18.51 |   | 5.14  |  |  |
| 334 | scut0000683 | balsalazide           | -8.27 | -21.90 |   | 2.69  |  |  |
| 335 | scut0006305 | procarbazine          | -8.27 | -21.93 |   | 4.49  |  |  |
| 336 | scut0007432 | thiamine              | -8.27 | -13.15 |   | 5.04  |  |  |
| 337 | scut0005557 | orphenadrine          | -8.29 | -12.08 |   | 6.19  |  |  |
| 338 | scut0001280 | carbamazepine         | -8.31 | -18.33 |   | 3.64  |  |  |
| 339 | scut0000676 | baclofen              | -8.33 | -14.33 |   | 4.68  |  |  |
| 340 | scut0004871 | metoclopramide        | -8.33 | -14.97 |   | 6.83  |  |  |
| 341 | scut0007307 | telmisartan           | -8.34 | -25.05 |   | 5.67  |  |  |
| 342 | scut0004692 | mercaptopurine        | -8.36 | -9.36  |   | 3.98  |  |  |
| 343 | scut0001576 | cholestyramine        | -8.36 | -14.88 |   | 8.4   |  |  |
| 344 | scut0001033 | bromocriptine         | -8.37 | x      |   | 3.81  |  |  |
| 345 | scut0000536 | aripiprazole          | -8.38 | -15.28 |   | 7.54  |  |  |
| 346 | scut0004624 | melfhalan             | -8.39 | -9.22  |   | 6.17  |  |  |
| 347 | scut0005425 | norgestrel            | -8.44 | -8.17  |   | 5.56  |  |  |
| 348 | scut0003858 | ibutilide             | -8.53 | -10.40 |   | 8.48  |  |  |
| 349 | scut0004799 | methocarbamol         | -8.55 | -17.56 |   | 5.79  |  |  |
| 350 | scut0002288 | diazoxide             | -8.61 | -14.83 |   | 3.82  |  |  |
| 351 | scut0002693 | efavirenz             | -8.61 | -14.37 |   | 4.34  |  |  |
| 352 | scut0005787 | penbutolol            | -8.63 | -19.32 |   | 7.47  |  |  |
| 353 | scut0008104 | zileuton              | -8.69 | -19.05 |   | 5.1   |  |  |
| 354 | scut0001115 | bupropion             | -8.85 | -16.45 |   | 5     |  |  |
| 355 | scut0005196 | nefazodone            | -8.91 | -14.23 |   | 9.2   |  |  |
| 356 | scut0005907 | phenazopyridine       | -9.02 | -18.92 |   | 3.68  |  |  |
| 357 | scut0002475 | dinoprostone          | -9.03 | -10.55 |   | 7.98  |  |  |
| 358 | scut0001349 | carteolol             | -9.03 | -16.44 |   | 7.31  |  |  |
| 359 | scut0001721 | cladribine            | -9.08 | -13.44 |   | 4.44  |  |  |
| 360 | scut0001819 | clonidine             | -9.08 | -17.70 |   | 4.63  |  |  |
| 361 | scut0000648 | azathioprine          | -9.13 | -21.37 |   | 5.78  |  |  |
| 362 | scut0004085 | irbesartan            | -9.14 | -26.25 |   | 6.45  |  |  |
| 363 | scut0002013 | cyclophosphamide      | -9.22 | -5.90  |   | 3.21  |  |  |
| 364 | scut0003950 | indomethacin          | -9.25 | -17.58 |   | 4.6   |  |  |
| 365 | scut0002680 | econazole             | -9.25 | -14.66 |   | 4.47  |  |  |
| 366 | scut0004442 | losartan              | -9.27 | -23.13 |   | 7.77  |  |  |
| 367 | scut0000331 | amiloride             | -9.27 | -15.17 |   | 6.36  |  |  |
| 368 | scut0006049 | pindolol              | -9.30 | -19.74 |   | 6.76  |  |  |
| 369 | scut0003579 | glipizide             | -9.33 | -19.13 |   | 6.42  |  |  |
| 370 | scut0000020 | acebutolol            | -9.34 | -22.38 |   | 6.52  |  |  |
| 371 | scut0001497 | chlorambucil          | -9.36 | -6.51  |   | 5.84  |  |  |
| 372 | scut0006810 | scopolamine           | -9.41 | -14.18 |   | 6.33  |  |  |

|     |             |                      |        |        |   |       |  |
|-----|-------------|----------------------|--------|--------|---|-------|--|
| 373 | scut0002608 | doxazosin            | -9.53  | -22.56 |   | 5.94  |  |
| 374 | scut0005993 | phytonadione         | -9.54  | -12.58 |   | 10.14 |  |
| 375 | scut0006649 | risperidone          | -9.62  | -18.29 |   | 9.77  |  |
| 376 | scut0004213 | labetalol            | -9.62  | -21.56 |   | 6.68  |  |
| 377 | scut0006314 | procyclidine         | -9.63  | -11.16 |   | 5.93  |  |
| 378 | scut0000603 | atropine             | -9.66  | -10.85 |   | 5.12  |  |
| 379 | scut0001881 | cocaine              | -9.70  | -15.94 |   | 5.79  |  |
| 380 | scut0000337 | aminocaproic acid    | -9.75  | -6.12  |   | 5.29  |  |
| 381 | scut0000076 | acetylsalicylic acid | -9.78  | -14.82 |   | 4.99  |  |
| 382 | scut0001007 | brinzolamide         | -9.78  | -12.28 |   | 5.12  |  |
| 383 | scut0000167 | albuterol            | -9.79  | -13.52 |   | 5.64  |  |
| 384 | scut0004288 | levalbuterol         | -9.79  | -13.71 |   | 6.49  |  |
| 385 | scut0000088 | acitretin            | -9.83  | -19.18 |   | 4.98  |  |
| 386 | scut0002011 | cyclopentolate       | -9.89  | -9.03  |   | 5.49  |  |
| 387 | scut0004225 | lamivudine           | -9.90  | -16.58 |   | 4.7   |  |
| 388 | scut0007206 | tacrine              | -9.92  | -14.17 | o | 4.32  |  |
| 389 | scut0002071 | dantrolene           | -9.98  | -27.10 |   | 5.22  |  |
| 390 | scut0004983 | mitoxantrone         | -10.01 | -32.19 |   | 8.19  |  |
| 391 | scut0006303 | procainamide         | -10.02 | -15.53 |   | 5.4   |  |
| 392 | scut0003931 | indapamide           | -10.02 | -24.45 |   | 3.72  |  |
| 393 | scut0005722 | pantoprazole         | -10.04 | -18.50 |   | 7.06  |  |
| 394 | scut0002338 | dicyclomine          | -10.12 | -8.23  |   | 6.96  |  |
| 395 | scut0004361 | linezolid            | -10.16 | -17.71 |   | 5.4   |  |
| 396 | scut0002415 | diltiazem            | -10.17 | -14.58 |   | 6.5   |  |
| 397 | scut0002327 | diclofenac           | -10.19 | -17.11 |   | 4.79  |  |
| 398 | scut0003644 | granisetron          | -10.24 | -21.88 |   | 5.25  |  |
| 399 | scut0003532 | gemfibrozil          | -10.36 | -15.94 |   | 6.74  |  |
| 400 | scut0002787 | entacapone           | -10.45 | -21.40 |   | 5.19  |  |
| 401 | scut0007567 | timolol              | -10.48 | -15.37 |   | 5.82  |  |
| 402 | scut0001558 | chlorpheniramine     | -10.53 | -11.44 |   | 5.97  |  |
| 403 | scut0001112 | bupivacaine          | -10.66 | -19.72 |   | 6.38  |  |
| 404 | scut0006586 | repaglinide          | -10.67 | -20.36 |   | 8.21  |  |
| 405 | scut0008121 | ziprasidone          | -10.74 | -19.54 |   | 8.22  |  |
| 406 | scut0005754 | paroxetine           | -10.74 | -16.92 |   | 6.62  |  |
| 407 | scut0005086 | mycophenolic acid    | -10.76 | -13.31 |   | 7.4   |  |
| 408 | scut0003371 | fluvastatin          | -10.76 | -15.53 |   | 7.02  |  |
| 409 | scut0000263 | alprostadil          | -10.76 | -10.37 |   | 8.26  |  |
| 410 | scut0005990 | physostigmine        | -10.77 | -17.24 |   | 5.01  |  |
| 411 | scut0004527 | maprotiline          | -10.81 | -19.01 |   | 6.18  |  |
| 412 | scut0007529 | ticlopidine          | -10.85 | -12.36 |   | 5.45  |  |
| 413 | scut0004302 | levobunolol          | -10.87 | -16.85 |   | 7.64  |  |
| 414 | scut0006300 | probenecid           | -10.88 | -12.54 |   | 5.7   |  |
| 415 | scut0004894 | metronidazole        | -10.91 | -15.27 |   | 4.24  |  |
| 416 | scut0005165 | naphazoline          | -10.96 | -16.96 |   | 5.14  |  |
| 417 | scut0001330 | carmustine           | -10.97 | -6.31  |   | 3.81  |  |
| 418 | scut0001101 | bumetanide           | -10.98 | -17.39 |   | 6.02  |  |
| 419 | scut0001268 | capsaicine           | -11.00 | -15.19 |   | 7.15  |  |



## DMD #35808

|     |             |                      |        |        |  |       |  |
|-----|-------------|----------------------|--------|--------|--|-------|--|
| 420 | scut0004956 | minoxidil            | -11.13 | -17.23 |  | 4.34  |  |
| 421 | scut0000738 | benazepril           | -11.15 | -20.50 |  | 7.48  |  |
| 422 | scut0007177 | sumatriptan          | -11.23 | -19.45 |  | 8.29  |  |
| 423 | scut0003914 | imiquimod            | -11.28 | -17.16 |  | 4.84  |  |
| 424 | scut0000001 | abacavir             | -11.38 | -12.80 |  | 6.28  |  |
| 425 | scut0002559 | dobutamine           | -11.49 | -15.32 |  | 7.17  |  |
| 426 | scut0004239 | lansoprazole         | -11.52 | -14.53 |  | 6.52  |  |
| 427 | scut0007692 | torasemide           | -11.73 | -24.47 |  | 5.21  |  |
| 428 | scut0006558 | ranitidine           | -11.84 | -18.03 |  | 8.75  |  |
| 429 | scut0005185 | nateglinide          | -12.00 | -18.46 |  | 6.06  |  |
| 430 | scut0006104 | pirbuterol           | -12.06 | -18.04 |  | 6.29  |  |
| 431 | scut0003138 | fenoldopam           | -12.07 | -15.84 |  | 5.41  |  |
| 432 | scut0004282 | leucovorin           | -12.23 | -29.09 |  | 8.36  |  |
| 433 | scut0000812 | benzonatate          | -12.25 | -12.96 |  | 5.39  |  |
| 434 | scut0005178 | naratriptan          | -12.26 | -19.56 |  | 7.66  |  |
| 435 | scut0003613 | glyburide            | -12.42 | -19.77 |  | 6.93  |  |
| 436 | scut0005525 | olsalazine           | -12.45 | -22.72 |  | 3.19  |  |
| 437 | scut0004622 | meloxicam            | -12.56 | -29.75 |  | 4.81  |  |
| 438 | scut0000348 | aminophylline        | -12.67 | -15.19 |  | 4.75  |  |
| 439 | scut0007426 | theophylline         | -12.67 | -15.19 |  | 4.61  |  |
| 440 | scut0008136 | zolpidem             | -12.67 | -18.43 |  | 5.78  |  |
| 441 | scut0002241 | dexpanthenol         | -12.76 | -12.41 |  | 4.14  |  |
| 442 | scut0007930 | valacyclovir         | -12.95 | -16.80 |  | 6.77  |  |
| 443 | scut0004400 | lodoxamide           | -13.05 | -20.91 |  | 3.39  |  |
| 444 | scut0003786 | hydralazine          | -13.06 | -18.87 |  | 3.29  |  |
| 445 | scut0005237 | nevirapine           | -13.08 | -15.70 |  | 4.37  |  |
| 446 | scut0004165 | itraconazole         | -13.09 | -13.47 |  | 3.87  |  |
| 447 | scut0003882 | ifosfamide           | -13.23 | -6.83  |  | 4.47  |  |
| 448 | scut0006670 | rofecoxib            | -13.36 | -20.45 |  | 5.05  |  |
| 449 | scut0001565 | chlorpropamide       | -13.37 | -16.83 |  | 3.31  |  |
| 450 | scut0007945 | valsartan            | -13.40 | -22.01 |  | 8.87  |  |
| 451 | scut0005870 | pergolide            | -13.47 | -15.72 |  | 6.04  |  |
| 452 | scut0005016 | molindone            | -13.50 | -14.96 |  | 5.17  |  |
| 453 | scut0004128 | isoniazid            | -13.51 | -17.57 |  | 3.88  |  |
| 454 | scut0007578 | tioconazole          | -13.52 | -10.78 |  | 4.9   |  |
| 455 | scut0003057 | famciclovir          | -13.57 | -14.26 |  | 5.72  |  |
| 456 | scut0001639 | cimetidine           | -13.60 | -17.69 |  | 6.52  |  |
| 457 | scut0003479 | furosemide           | -13.82 | -18.02 |  | 6.2   |  |
| 458 | scut0008074 | zaleplon             | -13.97 | -24.03 |  | 4.31  |  |
| 459 | scut0004981 | mitotane             | -14.13 | -8.28  |  | 2.34  |  |
| 460 | scut0008140 | zomitriptan          | -14.29 | -18.43 |  | 8.71  |  |
| 461 | scut0002125 | delavirdine mesylate | -14.43 | -28.30 |  | -3.56 |  |
| 462 | scut0001828 | clopidogrel          | -14.48 | -15.02 |  | 4.59  |  |
| 463 | scut0002045 | cytarabine           | -14.51 | -21.23 |  | 5.38  |  |
| 464 | scut0002302 | dibucaine            | -14.63 | -16.68 |  | 7.6   |  |
| 465 | scut0006376 | propranolol          | -14.67 | -20.51 |  | 5.83  |  |
| 466 | scut0005534 | ondansetron          | -14.68 | -19.17 |  | 5.19  |  |

## DMD #35808

|     |             |                  |        |        |   |        |   |
|-----|-------------|------------------|--------|--------|---|--------|---|
| 467 | scut0007658 | tolnaftate       | -14.69 | -22.51 |   | 4.51   |   |
| 468 | scut0007344 | terbinafine      | -14.73 | -15.37 |   | 7.37   |   |
| 469 | scut0005115 | nadolol          | -14.82 | -18.28 |   | 7.43   |   |
| 470 | scut0006451 | pyridoxine       | -15.18 | -12.41 |   | 5.37   |   |
| 471 | scut0004226 | lamotrigine      | -15.31 | -16.65 |   | 4.17   |   |
| 472 | scut0004369 | liothyronine     | -15.55 | -12.94 |   | 4.3    |   |
| 473 | scut0006481 | quetiapine       | -15.94 | -21.89 |   | 5.99   |   |
| 474 | scut0002738 | emedastine       | -15.97 | -16.10 |   | 5.47   |   |
| 475 | scut0005603 | oxazepam         | -16.14 | -16.82 |   | 4.56   |   |
| 476 | scut0007642 | tolazamide       | -16.19 | -20.78 |   | 3.64   |   |
| 477 | scut0005341 | nitazoxanide     | -16.34 | -19.60 |   | 4.31   |   |
| 478 | scut0001570 | chlorthalidone   | -16.40 | -19.10 |   | 4.65   |   |
| 479 | scut0005419 | norfloxacin      | -16.64 | -15.14 |   | 4.4    |   |
| 480 | scut0005520 | olopatadine      | -16.91 | -20.81 |   | 6.29   |   |
| 481 | scut0003938 | indinavir        | -17.03 | -20.50 |   | 8.53   |   |
| 482 | scut0007752 | triamterene      | -17.13 | -19.70 |   | 3.54   |   |
| 483 | scut0006852 | sertraline       | -17.31 | -14.18 |   | 4.11   |   |
| 484 | scut0008142 | zonisamide       | -17.47 | -17.93 |   | 5.84   |   |
| 485 | scut0007645 | tolbutamide      | -17.56 | -16.63 |   | 6.33   |   |
| 486 | scut0005044 | morizidine       | -17.75 | -18.51 |   | 6.17   |   |
| 487 | scut0004334 | levothyroxine    | -17.93 | -10.79 |   | 4.46   |   |
| 488 | scut0007817 | trimethoprim     | -18.06 | -17.49 |   | 5.86   |   |
| 489 | scut0004200 | ketotifen        | -18.11 | -13.81 |   | 4.57   |   |
| 490 | scut0007207 | tacrolimus       | -18.22 | 12.56  | o | -10.92 | y |
| 491 | scut0004717 | mesoridazine     | -18.33 | -14.85 |   | 7.79   |   |
| 492 | scut0000426 | anastrozole      | -18.37 | -15.93 |   | 4.92   |   |
| 493 | scut0005609 | oxcarbazepine    | -18.76 | -24.99 |   | 3.42   |   |
| 494 | scut0003347 | flurazepam       | -18.87 | -14.31 |   | 4.21   |   |
| 495 | scut0000240 | alosetron        | -18.96 | -18.81 |   | 5.28   |   |
| 496 | scut0006660 | rizatriptan      | -18.98 | -17.25 |   | 9.46   |   |
| 497 | scut0004764 | methadone        | -19.20 | -13.81 |   | 6.85   |   |
| 498 | scut0005319 | nilutamide       | -19.40 | -20.73 |   | 4.32   |   |
| 499 | scut0006142 | piroxicam        | -19.61 | -29.92 |   | 2.94   |   |
| 500 | scut0003276 | flumazenil       | -19.68 | -19.67 |   | 4.02   |   |
| 501 | scut0002037 | cyproheptadine   | -19.71 | -17.52 |   | 5.2    |   |
| 502 | scut0007472 | thioridazine     | -20.21 | -15.14 |   | 7.19   |   |
| 503 | scut0005137 | naftifine        | -20.48 | -21.84 |   | 7.11   |   |
| 504 | scut0006476 | quazepam         | -20.68 | -12.67 |   | 3.64   |   |
| 505 | scut0003256 | fluconazole      | -20.74 | -12.61 |   | 5.19   |   |
| 506 | scut0002999 | etodolac         | -21.06 | -15.65 |   | 6.25   |   |
| 507 | scut0007477 | thiothixene      | -21.10 | -18.75 |   | 6.16   |   |
| 508 | scut0007443 | thiethylperazine | -22.46 | -19.52 |   | 7.07   |   |
| 509 | scut0003372 | fluvoxamine      | -22.48 | -14.23 |   | 6.3    |   |
| 510 | scut0004261 | leflunomide      | -22.70 | -17.13 |   | 3.52   |   |
| 511 | scut0005847 | pentoxifylline   | -22.97 | -16.08 |   | 6.25   |   |
| 512 | scut0002562 | docetaxol        | -23.09 | 16.02  | o | -20.06 | y |
| 513 | scut0001510 | chlordiazepoxide | -23.89 | -16.20 |   | 6.5    |   |

|     |             |                  |        |        |   |        |  |   |
|-----|-------------|------------------|--------|--------|---|--------|--|---|
| 514 | scut0004431 | lorazepam        | -24.73 | -17.01 |   | 4.07   |  |   |
| 515 | scut0001877 | clozapine        | -25.06 | -16.76 |   | 5.58   |  |   |
| 516 | scut0002832 | eptifibatide     | -25.70 | -4.85  | o | -1.98  |  | y |
| 517 | scut0007312 | temazepam        | -26.13 | -18.89 |   | 3.25   |  |   |
| 518 | scut0004924 | midazolam        | -26.75 | -17.56 |   | 4.98   |  |   |
| 519 | scut0006308 | prochlorperazine | -27.96 | -16.14 |   | 6.22   |  |   |
| 520 | scut0000361 | amiodarone       | -28.24 | -18.30 |   | 7.63   |  |   |
| 521 | scut0008028 | warfarin         | -28.42 | -20.45 |   | 5.74   |  |   |
| 522 | scut0005884 | perphenazine     | -28.57 | -18.91 |   | 5.56   |  |   |
| 523 | scut0003323 | fluoxetine       | -29.24 | -11.81 |   | 6.17   |  |   |
| 524 | scut0004806 | methotrexate     | -29.78 | -28.26 |   | 7.94   |  |   |
| 525 | scut0004278 | letrozole        | -30.08 | -11.82 |   | 4.68   |  |   |
| 526 | scut0005436 | nortriptyline    | -30.18 | -18.96 |   | 5.9    |  |   |
| 527 | scut0001841 | clorazepate      | -30.19 | -15.57 |   | 3.36   |  |   |
| 528 | scut0004969 | mirtazapine      | -30.37 | -17.44 |   | 4.4    |  |   |
| 529 | scut0001996 | cyclobenzaprine  | -30.92 | -16.71 |   | 5.41   |  |   |
| 530 | scut0002871 | estazolam        | -31.53 | -16.77 |   | 4.48   |  |   |
| 531 | scut0006338 | promethazine     | -31.67 | -17.61 |   | 5.87   |  |   |
| 532 | scut0002386 | digoxin          | -31.74 | x      |   | -15.71 |  | y |
| 533 | scut0002611 | doxepin          | -31.85 | -21.80 |   | 5.51   |  |   |
| 534 | scut0000373 | amitriptyline    | -32.14 | -14.99 |   | 5.27   |  |   |
| 535 | scut0005510 | olanzapine       | -32.77 | -14.39 |   | 4.82   |  |   |
| 536 | scut0002284 | diazepam         | -33.35 | -17.69 |   | 4.99   |  |   |
| 537 | scut0005598 | oxaprozin        | -33.36 | -19.84 |   | 5.68   |  |   |
| 538 | scut0007755 | triazolam        | -33.65 | -17.53 |   | 3.73   |  |   |
| 539 | scut0001784 | clofazimine      | -34.31 | -17.94 |   | 5.09   |  |   |
| 540 | scut0001708 | citalopram       | -34.75 | -11.39 |   | 4.92   |  |   |
| 541 | scut0001817 | clonazepam       | -36.75 | -22.44 |   | 4.98   |  |   |
| 542 | scut0003912 | imipramine       | -36.82 | -14.72 |   | 6      |  |   |
| 543 | scut0007796 | trifluoperazine  | -37.25 | -16.34 |   | 6.59   |  |   |
| 544 | scut0002180 | desipramine      | -37.57 | -13.90 |   | 5.6    |  |   |
| 545 | scut0007822 | trimipramine     | -38.56 | -13.61 |   | 5.29   |  |   |
| 546 | scut0001564 | chlorpromazine   | -41.00 | -16.04 |   | 4.76   |  |   |
| 547 | scut0003330 | fluphenazine     | -41.58 | -19.80 |   | 6.28   |  |   |
| 548 | scut0000260 | alprazolam       | -42.70 | -18.33 |   | 3.18   |  |   |
| 549 | scut0008002 | vinorelbine      | -72.37 | x      |   | -27.34 |  | y |
| 550 | scut0007984 | vinblastine      | -76.82 | 9.21   | o | -9.87  |  | y |

\*: Drugs ranked according to ECFP-2 scores.

\*\*：“o” indicates the drug was docked outside of binding pocket. “+” indicates the drug has a positive score.

\*\*\*：“s” indicates the compound belongs to training or test set. “b” and “c” indicate the compound was reported as hPXR activator or nonactivator but not included in training or test set.

\*\*\*\*：“y” means the compound is screened out from further virtual screening.

A

|                                                                                                                                                          |                                                                                                                                                         |                                                                                                                                                         |                                                                                                                                                        |                                                                                                                                                          |
|----------------------------------------------------------------------------------------------------------------------------------------------------------|---------------------------------------------------------------------------------------------------------------------------------------------------------|---------------------------------------------------------------------------------------------------------------------------------------------------------|--------------------------------------------------------------------------------------------------------------------------------------------------------|----------------------------------------------------------------------------------------------------------------------------------------------------------|
| 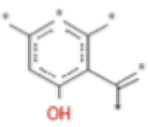 <p>G1: -1365167212<br/>11 out of 11 good<br/>Bayesian Score: 0.559</p> |  <p>G2: 1644070299<br/>10 out of 10 good<br/>Bayesian Score: 0.553</p> |  <p>G3: 478798802<br/>10 out of 10 good<br/>Bayesian Score: 0.553</p>  |  <p>G4: 959053371<br/>9 out of 9 good<br/>Bayesian Score: 0.545</p>   |  <p>G5: -1107434619<br/>9 out of 9 good<br/>Bayesian Score: 0.545</p>  |
|  <p>G6: -910059776<br/>9 out of 9 good<br/>Bayesian Score: 0.545</p>    |  <p>G7: -1949930289<br/>9 out of 9 good<br/>Bayesian Score: 0.545</p>  |  <p>G8: -57879732<br/>9 out of 9 good<br/>Bayesian Score: 0.545</p>    |  <p>G9: 1645094437<br/>9 out of 9 good<br/>Bayesian Score: 0.545</p>  |  <p>G10: 1000909115<br/>8 out of 8 good<br/>Bayesian Score: 0.536</p>  |
|  <p>G11: -1048916822<br/>8 out of 8 good<br/>Bayesian Score: 0.536</p>  |  <p>G12: -1968258269<br/>7 out of 7 good<br/>Bayesian Score: 0.525</p> |  <p>G13: 1796421070<br/>7 out of 7 good<br/>Bayesian Score: 0.525</p>  |  <p>G14: -277120213<br/>7 out of 7 good<br/>Bayesian Score: 0.525</p> |  <p>G15: 84535642<br/>7 out of 7 good<br/>Bayesian Score: 0.525</p>    |
|  <p>G16: -2078659772<br/>7 out of 7 good<br/>Bayesian Score: 0.525</p> |  <p>G17: 645522063<br/>7 out of 7 good<br/>Bayesian Score: 0.525</p>  |  <p>G18: -917135307<br/>7 out of 7 good<br/>Bayesian Score: 0.525</p> |  <p>G19: -98561723<br/>6 out of 6 good<br/>Bayesian Score: 0.511</p> |  <p>G20: -101223435<br/>6 out of 6 good<br/>Bayesian Score: 0.511</p> |

**B**

|                                                                                                                                                     |                                                                                                                                                     |                                                                                                                                                      |                                                                                                                                                     |                                                                                                                                                       |
|-----------------------------------------------------------------------------------------------------------------------------------------------------|-----------------------------------------------------------------------------------------------------------------------------------------------------|------------------------------------------------------------------------------------------------------------------------------------------------------|-----------------------------------------------------------------------------------------------------------------------------------------------------|-------------------------------------------------------------------------------------------------------------------------------------------------------|
| 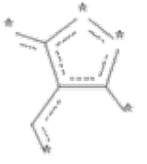<br>B1: 1333660716<br>0 out of 11 good<br>Bayesian Score: -1.926   | <br>B2: -1236953626<br>0 out of 9 good<br>Bayesian Score: -1.757   | <br>B3: -1791034651<br>0 out of 7 good<br>Bayesian Score: -1.554    | <br>B4: 1639858918<br>0 out of 7 good<br>Bayesian Score: -1.554    | <br>B5: 1306977740<br>0 out of 6 good<br>Bayesian Score: -1.435     |
| <br>B6: -1281678998<br>0 out of 6 good<br>Bayesian Score: -1.435   | <br>B7: -1292275645<br>0 out of 6 good<br>Bayesian Score: -1.435   | <br>B8: 1984293270<br>0 out of 6 good<br>Bayesian Score: -1.435     | <br>B9: 279095090<br>0 out of 6 good<br>Bayesian Score: -1.435     | <br>B10: -757679000<br>1 out of 12 good<br>Bayesian Score: -1.308   |
| <br>B11: -669219631<br>0 out of 5 good<br>Bayesian Score: -1.299   | <br>B12: 1638636092<br>0 out of 5 good<br>Bayesian Score: -1.299   | <br>B13: 497523368<br>0 out of 5 good<br>Bayesian Score: -1.299     | <br>B14: 577592657<br>0 out of 5 good<br>Bayesian Score: -1.299    | <br>B15: 1380144103<br>0 out of 5 good<br>Bayesian Score: -1.299    |
| <br>B16: 2021611721<br>0 out of 5 good<br>Bayesian Score: -1.299 | <br>B17: -749801696<br>0 out of 5 good<br>Bayesian Score: -1.299 | <br>B18: -427397688<br>1 out of 10 good<br>Bayesian Score: -1.152 | <br>B19: 1023016133<br>0 out of 4 good<br>Bayesian Score: -1.142 | <br>B20: -1120712636<br>0 out of 4 good<br>Bayesian Score: -1.142 |

**Supplemental Figure S1** Molecular features that contribute positively or negatively to a compound's PXR affinity identified by Bayesian model ECFP-2 using ECFP<sub>6</sub> fingerprints. **A.** Features that contributed positively to biological activity from ECFP-2 model. **B.** Features negatively impacting hPXR affinity from ECFP-2 model. Asterisks indicate that any atom can be represented. Numbers represent how many molecules out of the total number possessing the fingerprint are active (positive) or inactive (negative).

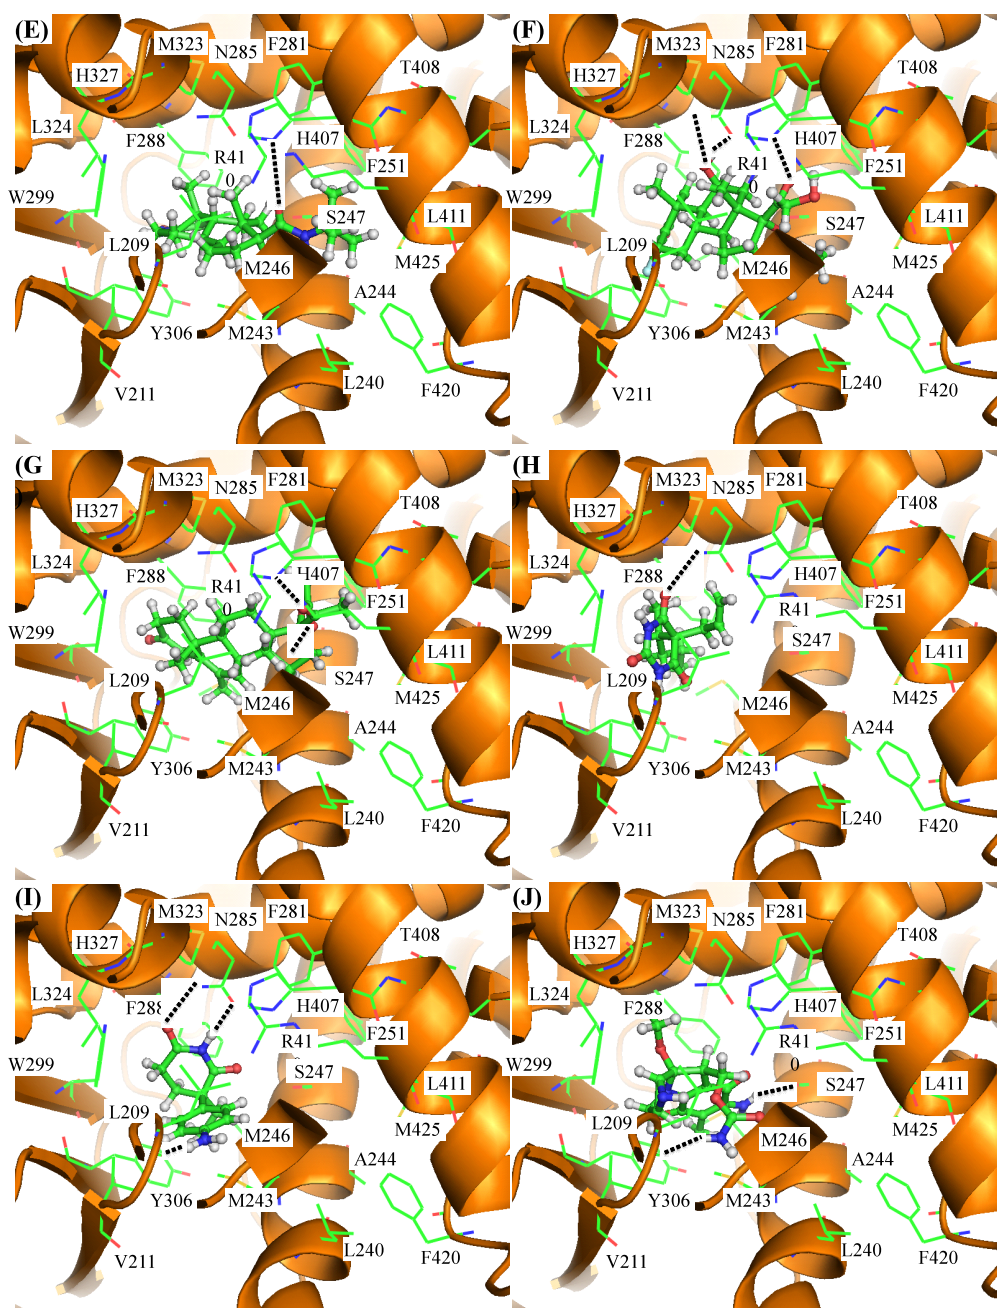

**Supplemental Figure S2** The Surflex docked (1NRL) conformations of newly identified PXR activators or an antagonist finasteride (E), flunisolid(F), megestrol (G), secobarbital (H), aminoglutethimide (I) and mitomycin (J). The hydrogen bonding interaction is shown as black dotted lines. The protein backbone is shown as ribbon

(orange), amino acid residues are shown in the stick mode whereas the PXR activators are shown in the ball and stick mode. The images were created using Pymol.

## References

- Ekins S, Kholodovych V, Ai N, Sinz M, Gal J, Gera L, Welsh WJ, Bachmann K and Mani S (2008) Computational discovery of novel low micromolar human pregnane X receptor antagonists. *Mol Pharmacol* **74**:662-672.
- Khandelwal A, Krasowski MD, Reschly EJ, Sinz MW, Swaan PW and Ekins S (2008) Machine learning methods and docking for predicting human pregnane X receptor activation. *Chem Res Toxicol* **21**:1457-1467.
- Kortagere S, Chekmarev D, Welsh WJ and Ekins S (2009) Hybrid scoring and classification approaches to predict human pregnane X receptor activators. *Pharm Res* **26**:1001-1011.
- Yasuda K, Ranade A, Venkataramanan R, Strom S, Chupka J, Ekins S, Schuetz E and Bachmann K (2008) A comprehensive in vitro and in silico analysis of antibiotics that activate pregnane X receptor and induce CYP3A4 in liver and intestine. *Drug Metab Dispos* **36**:1689-1697.
